# Supplementary material for: Timing of Confirmatory Trials for Drugs Granted Accelerated Approval Based on Surrogate Measures From 2012 to 2021
Source: PubMed Central journal article supplement (PMC10066454; doi:10.1001/jamahealthforum.2023.0217), 2023-03-31
Supplement: jamahealthforum-e230217-s001.pdf [file jamahealthforum-e230217-s001.pdf]

## Data Sharing Statement

Deshmukh. Timing of Confirmatory Trials for Drugs Granted Accelerated Approval Based on Surrogate Measures From 2012 to 2021. *JAMA Health Forum*. Published March 31, 2023. doi:10.1001/jamahealthforum.2023.0217

### Data

**Data available:** Yes

**Data types:** Data (not involving human participants)

**How to access data:** Data are all from public FDA sources.

**When available:** With publication

### Supporting Documents

**Document types:** None

### Additional Information

**Who can access the data:** Anyone requesting the data.

**Types of analyses:** Any purpose.

**Mechanisms of data availability:** From public FDA sources.
